# Supplementary material
Source: bioRxiv or medRxiv preprint supplement (https://www.biorxiv.org/highwire/filestream/73188/field_highwire_adjunct_files/5/091512-4.pdf)
Supplement: Supplementary file [file 091512-4.pdf]

**Figure S4 A**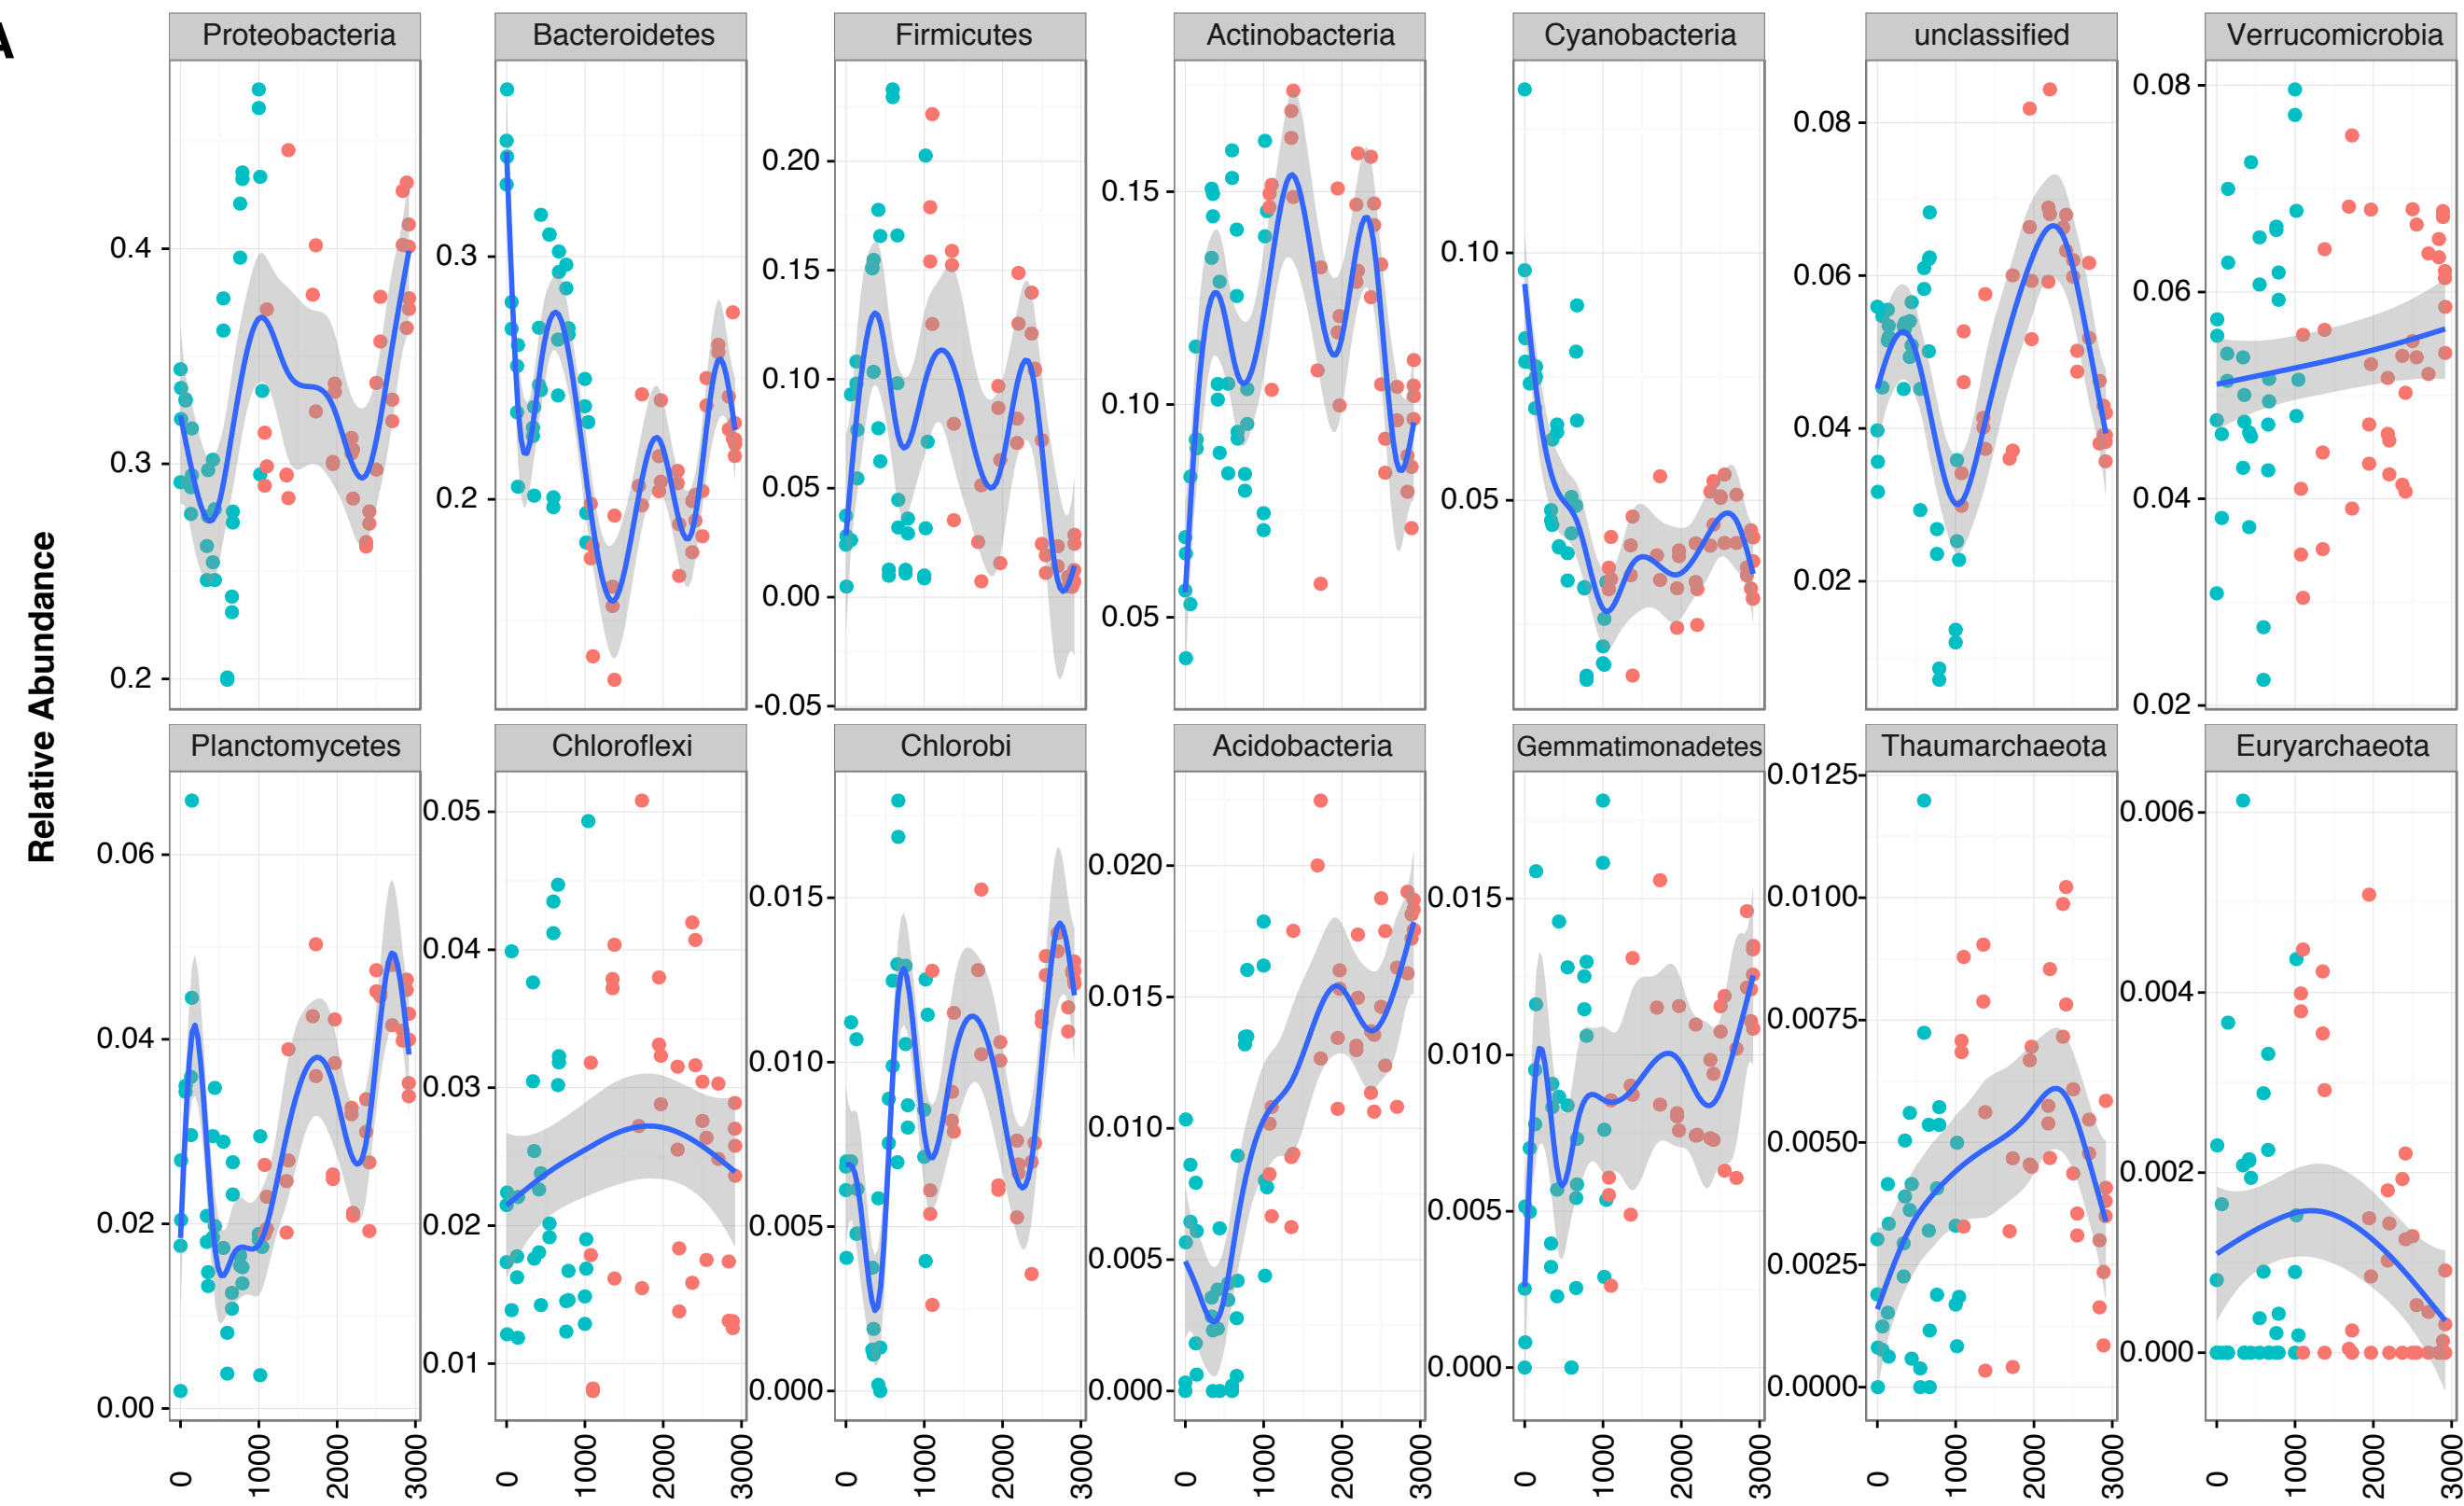**B**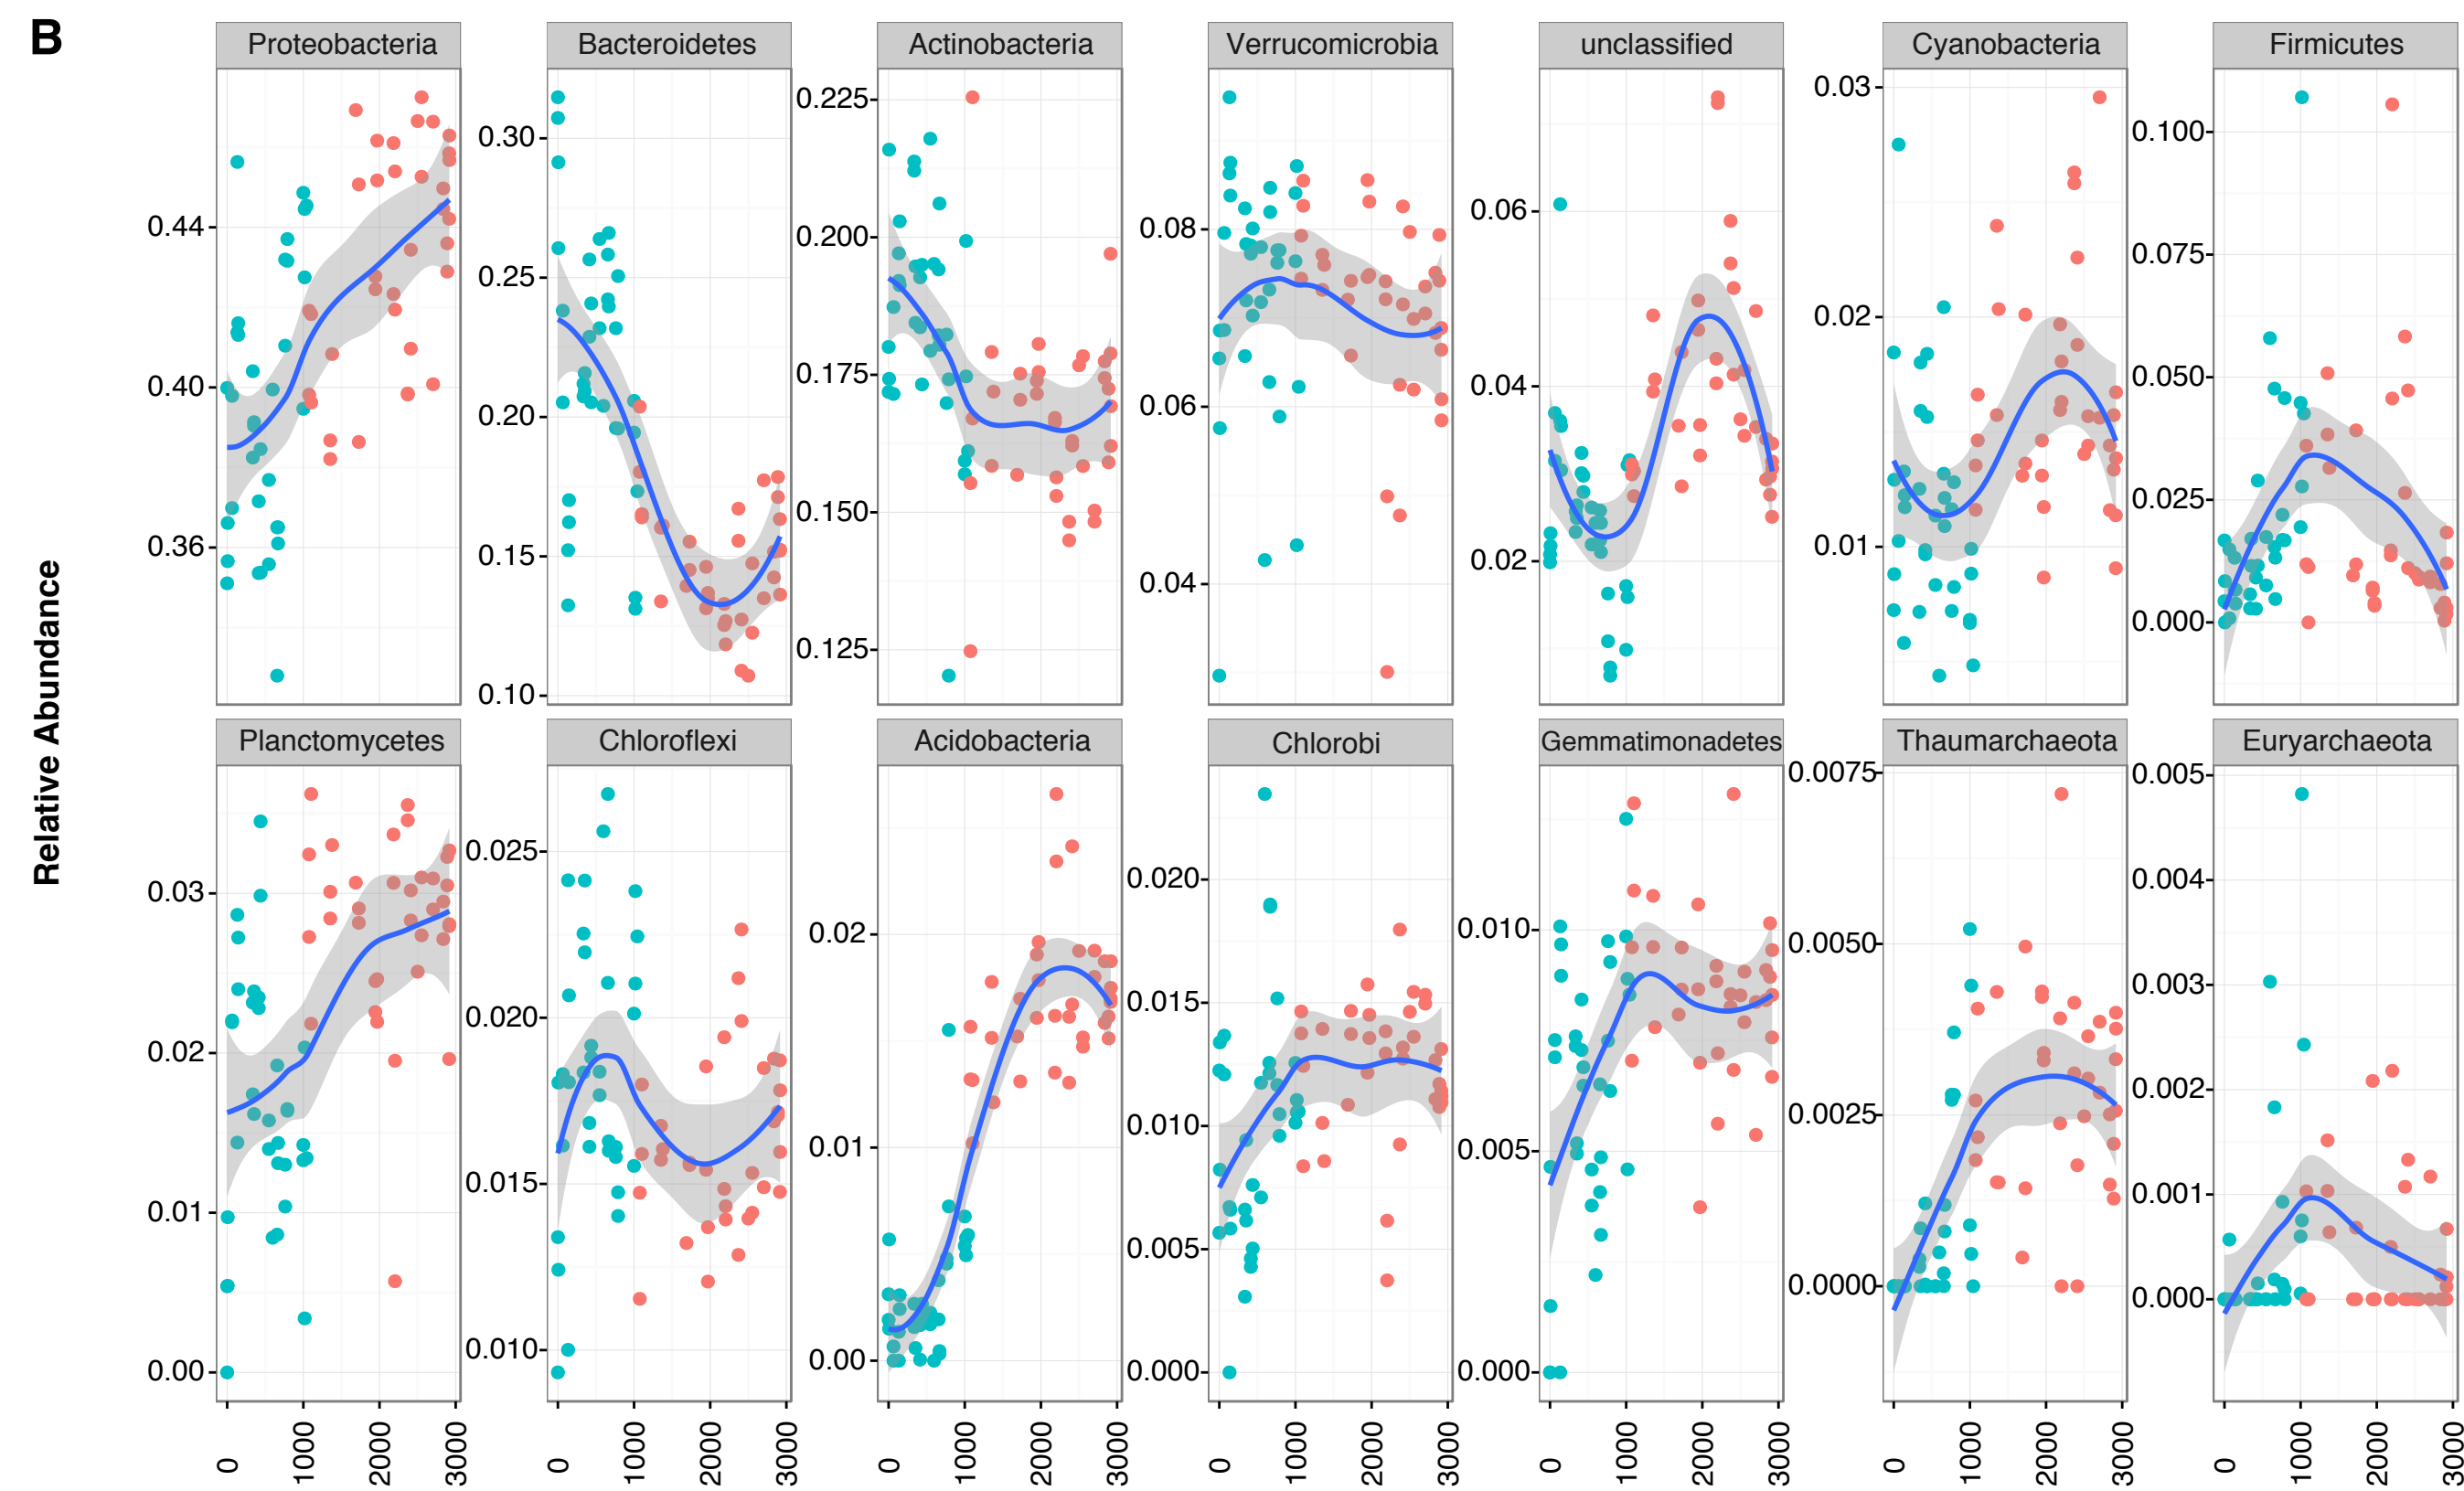**C**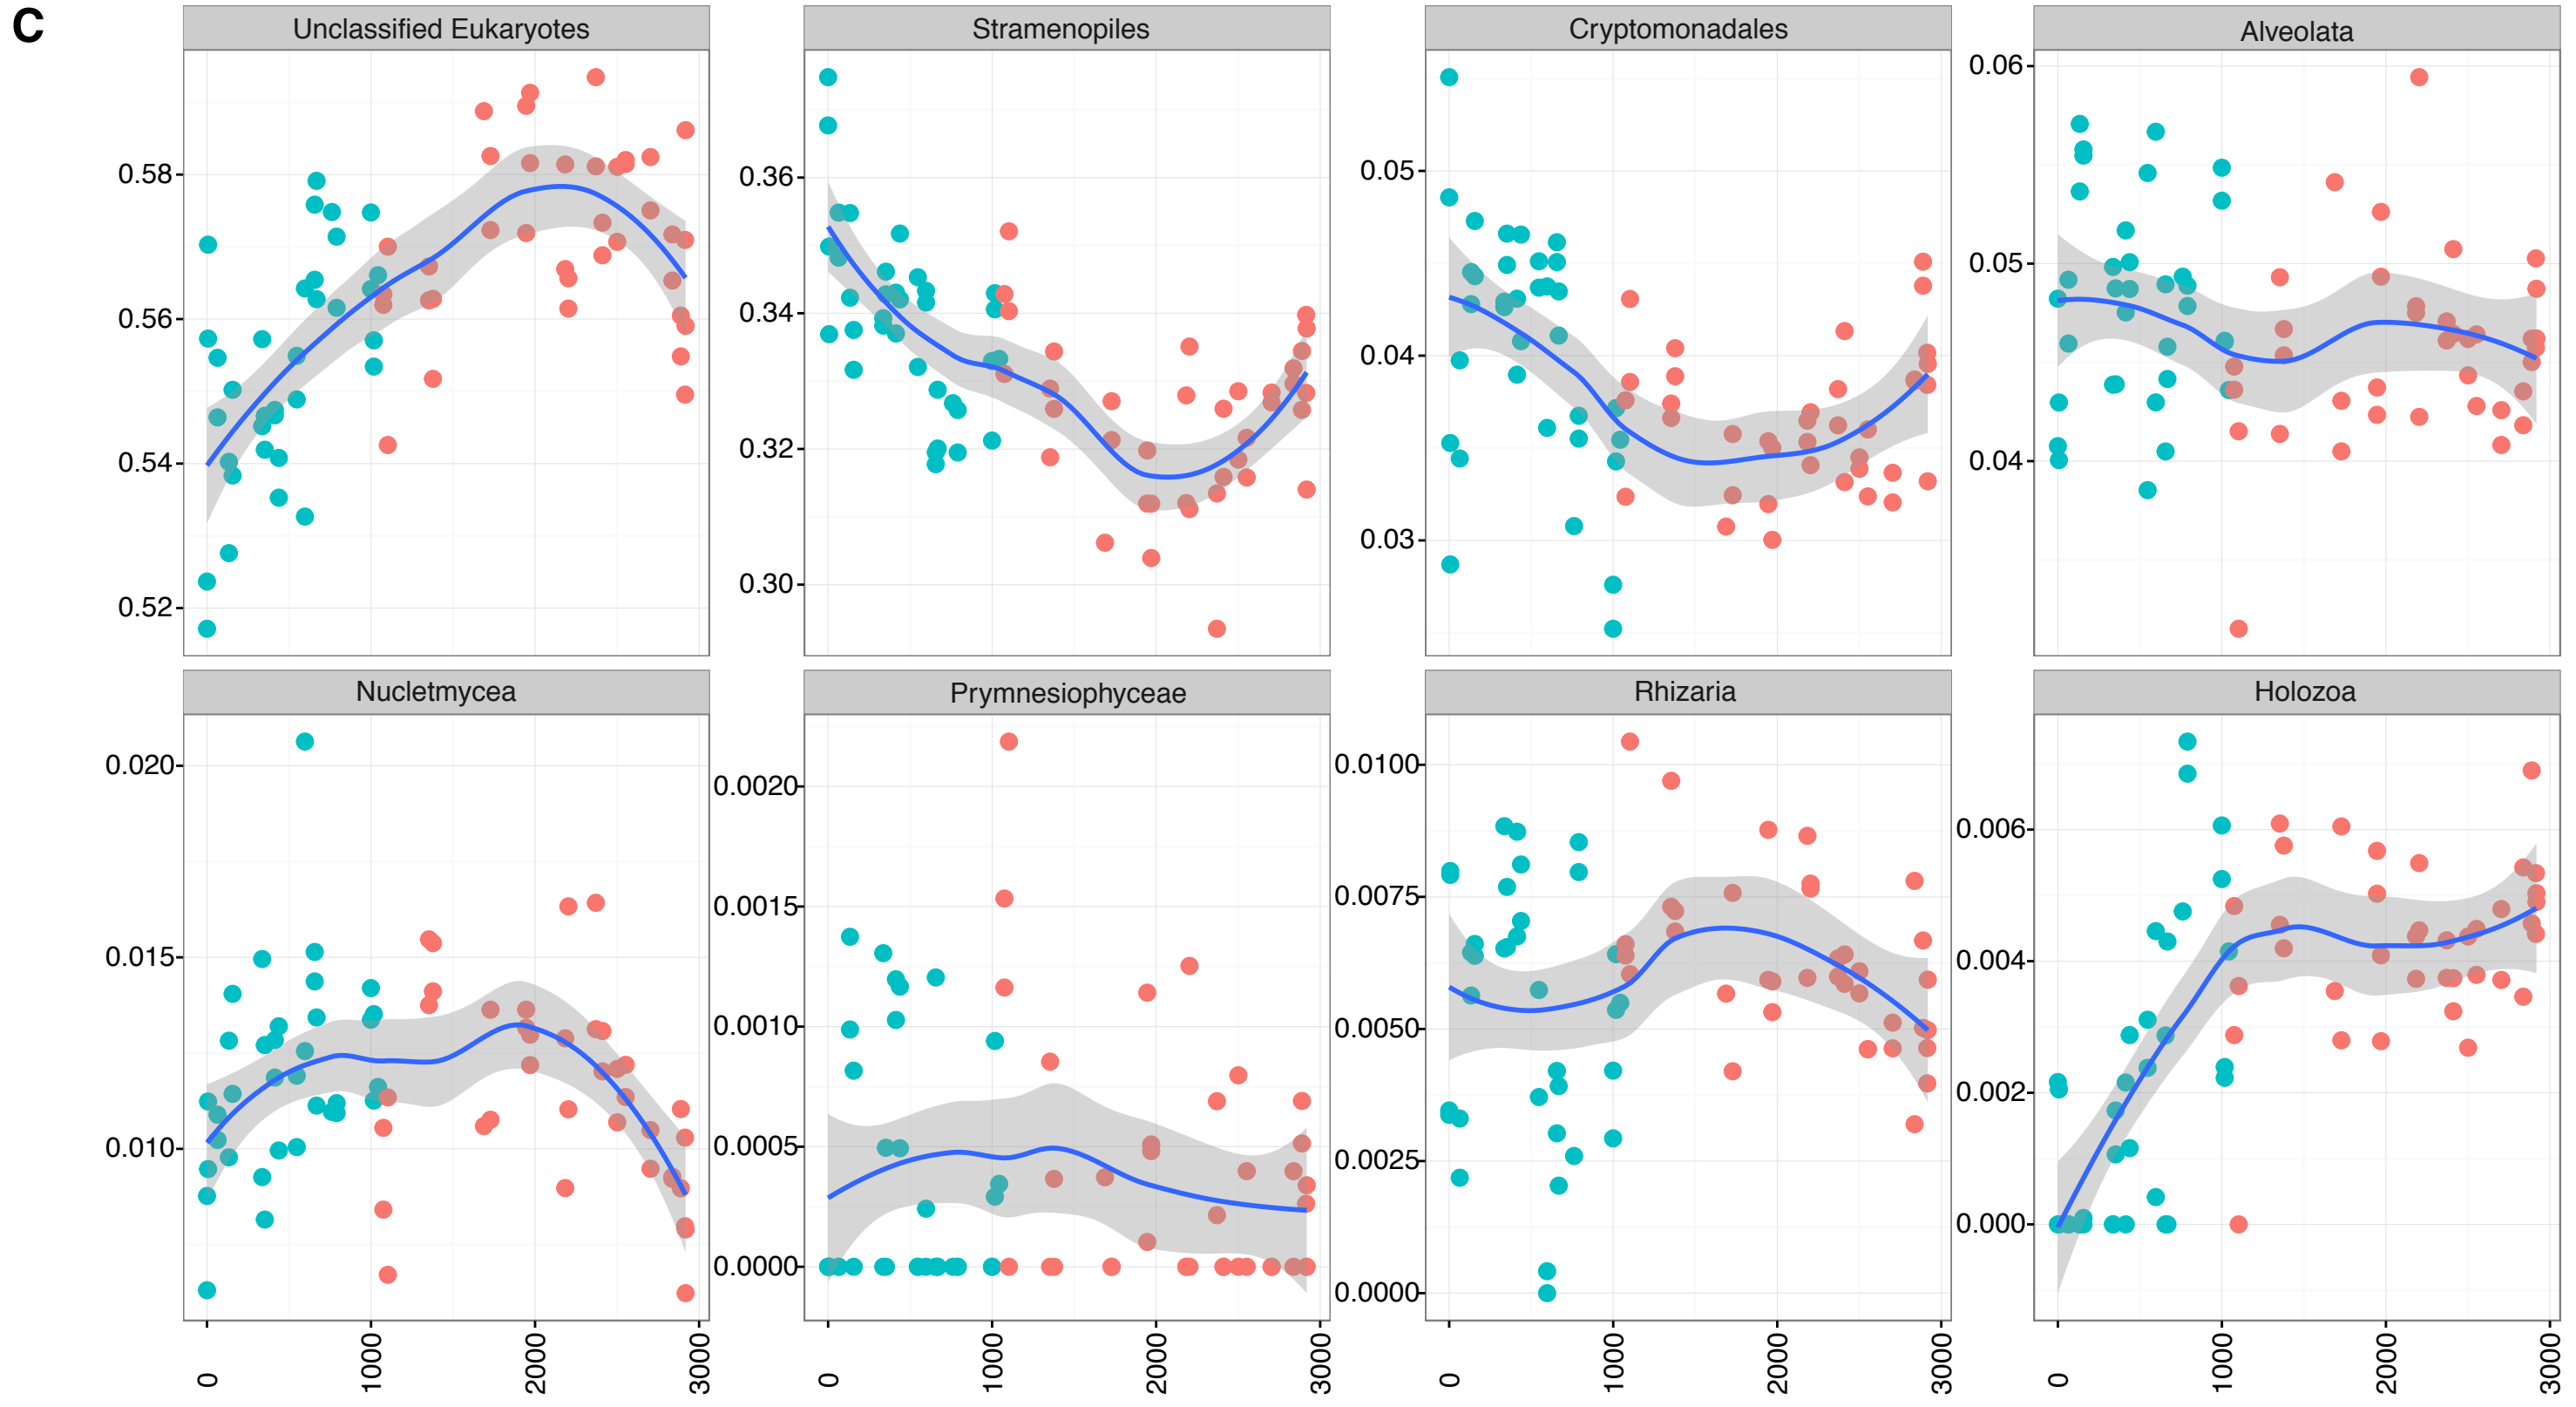**D**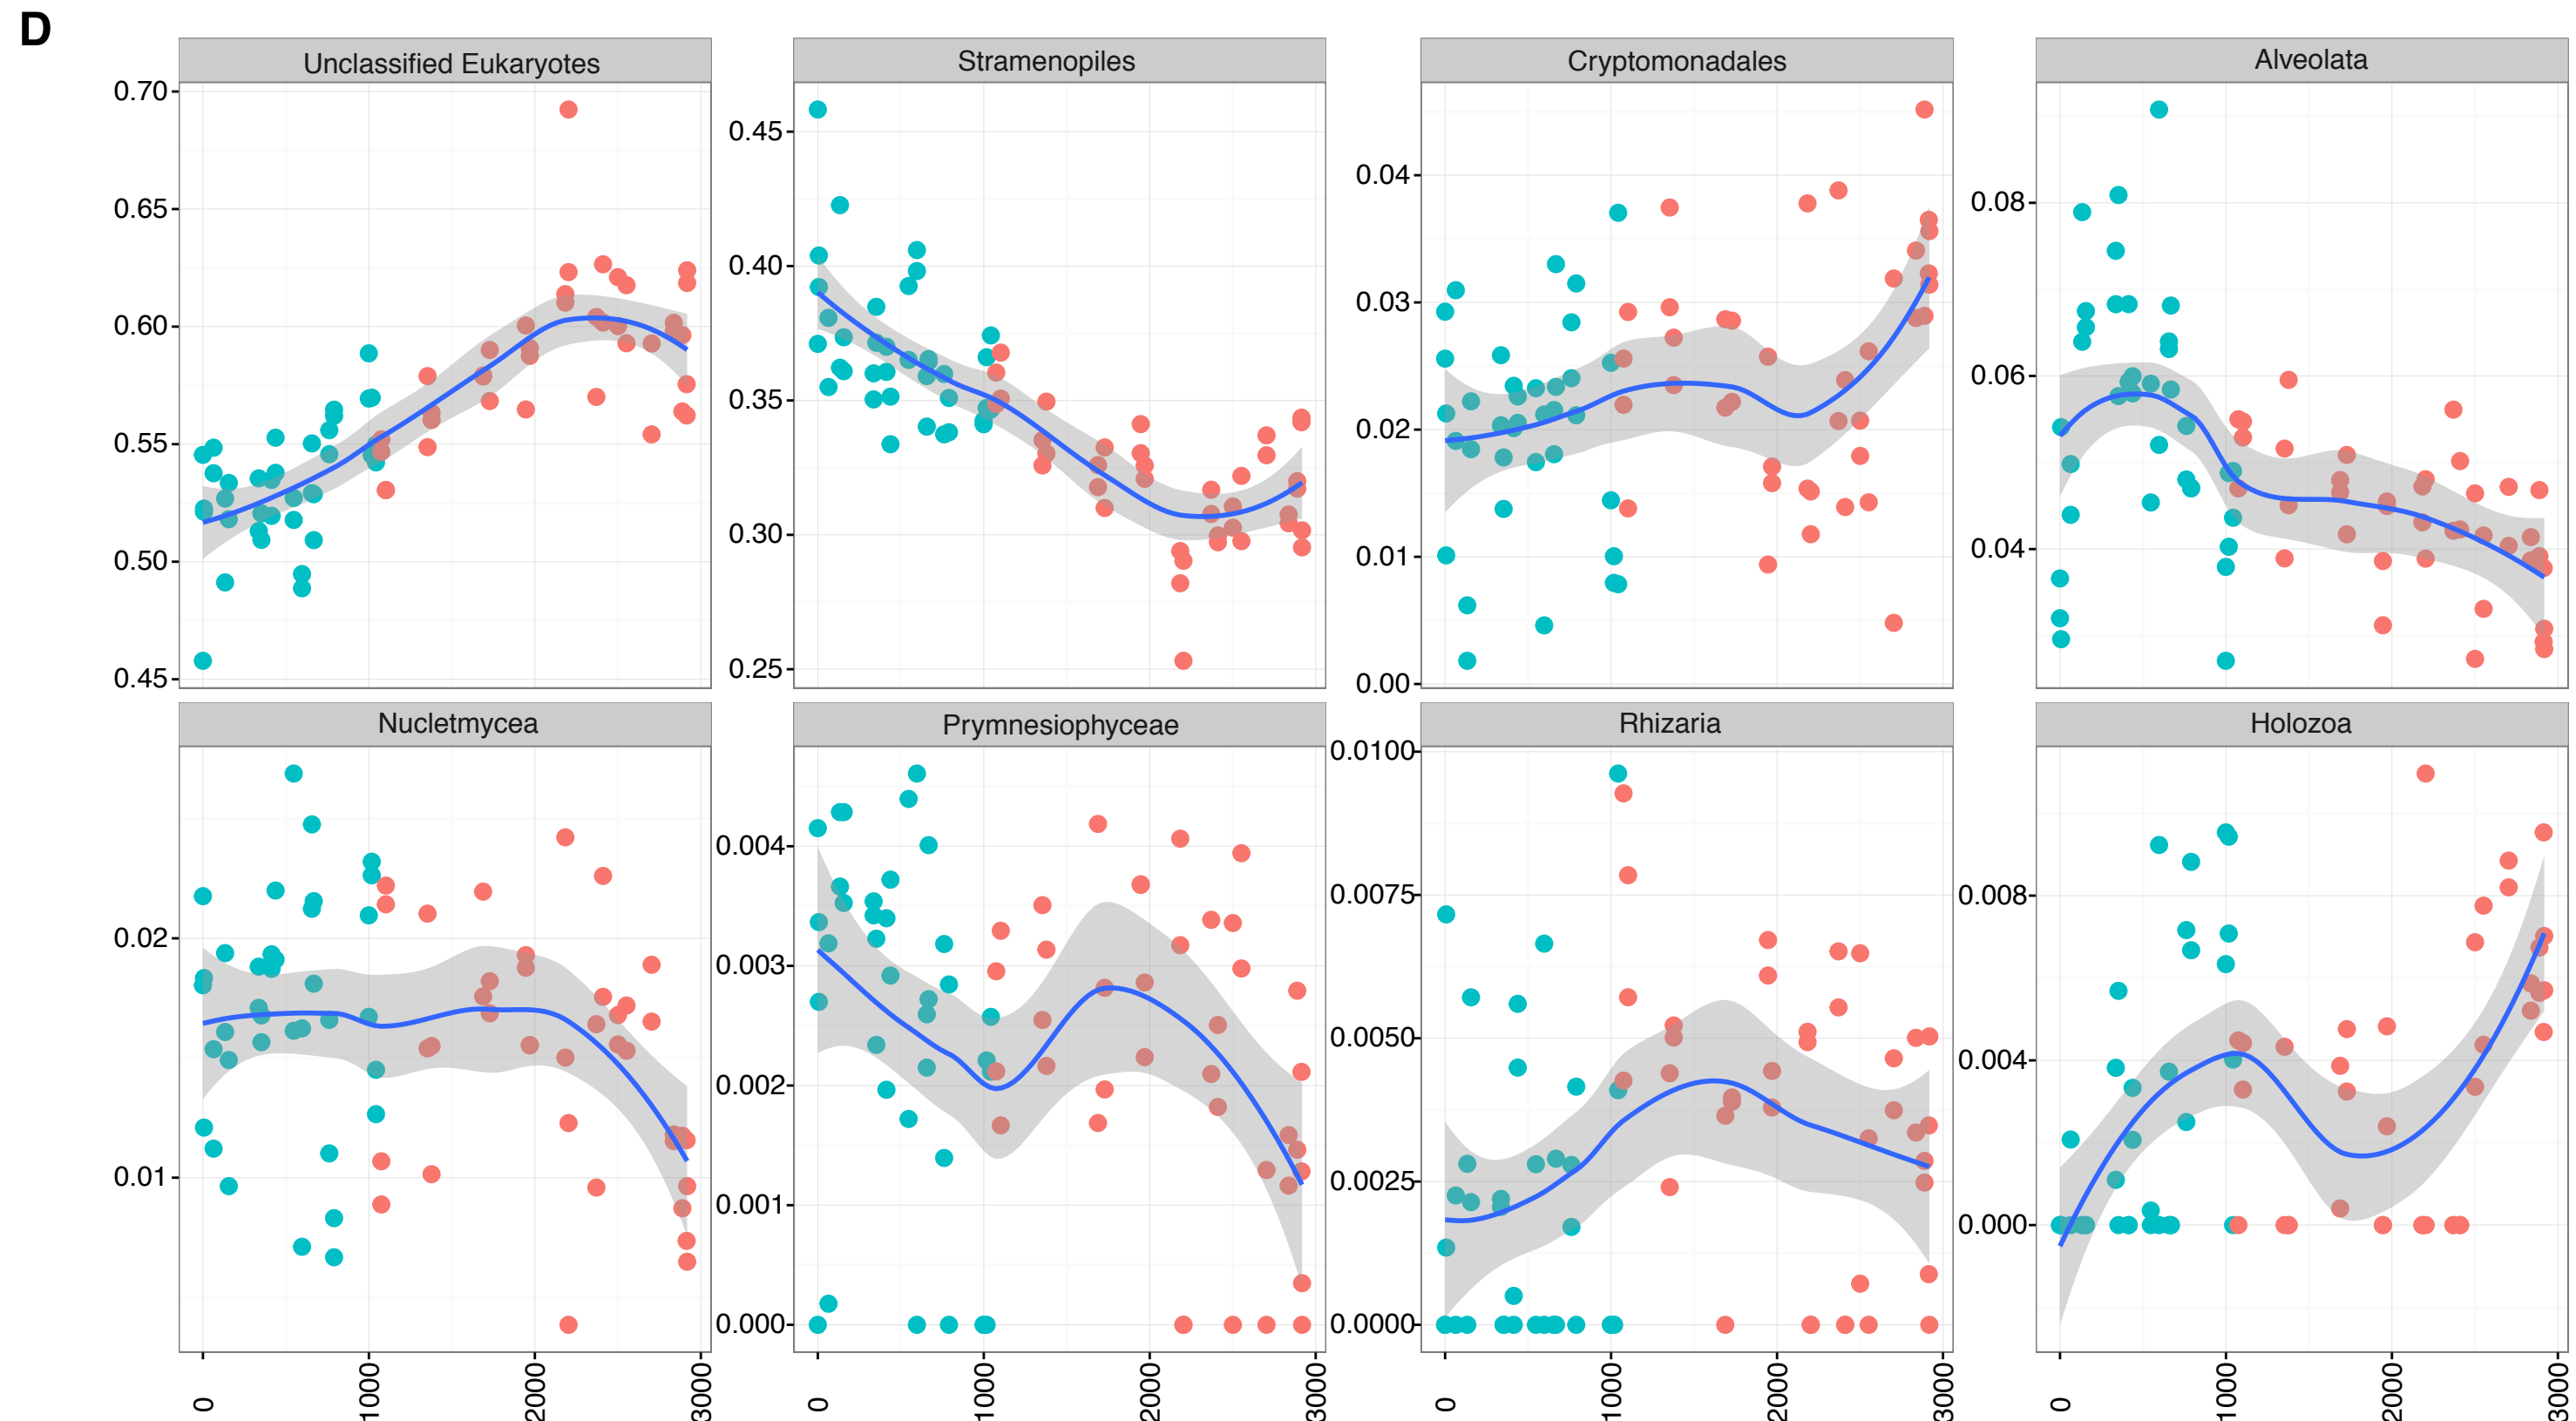

Distance (km)
